# Supplementary material
Source: publisher site journal article supplement (https://www.dovepress.com/article/424347)
Supplement: Supplementary file 1 [file get_supplementary_file.php]

**Supplemental material**

Supplementary Table 1 Outcomes of endovascular treatment in different collateral status

|  | Total  (n = 545) | Collateral Status | | *P* |
| --- | --- | --- | --- | --- |
|  | Good  (n = 347) | Poor  (n = 198) |
| 3-month mRS, Mean ± SD | 3.5 ± 2.1 | 3.3 ± 2.1 | 3.7 ± 2.1 | 0.051 |
| 3-month mRS, n (%) |  |  |  | 0.216 |
| 0 | 68 (12.5) | 44 (12.7) | 24 (12.1) |  |
| 1 | 69 (12.7) | 49 (14.1) | 20 (10.1) |  |
| 2 | 47 ( 8.6) | 34 (9.8) | 13 (6.6) |  |
| 3 | 82 (15.0) | 57 (16.4) | 25 (12.6) |  |
| 4 | 63 (11.6) | 35 (10.1) | 28 (14.1) |  |
| 5 | 57 (10.5) | 32 (9.2) | 25 (12.6) |  |
| 6 | 159 (29.2) | 96 (27.7) | 63 (31.8) |  |
| Unfavorable outcome, n (%) | 408 (74.9) | 254 (73.2) | 154 (77.8) | 0.279 |
| 3-month mortality, n (%) | 159 (29.2) | 96 (27.7) | 63 (31.8) | 0.354 |
| END, n (%) | 113 (20.9) | 71 (20.6) | 42 (21.4) | 0.915 |
| Hemorrhagic transformation, n (%) | 130 (23.9) | 83 (24) | 47 (23.9) | 0.997 |

Footnotes: SD, standard deviation; END, early neurological deterioration


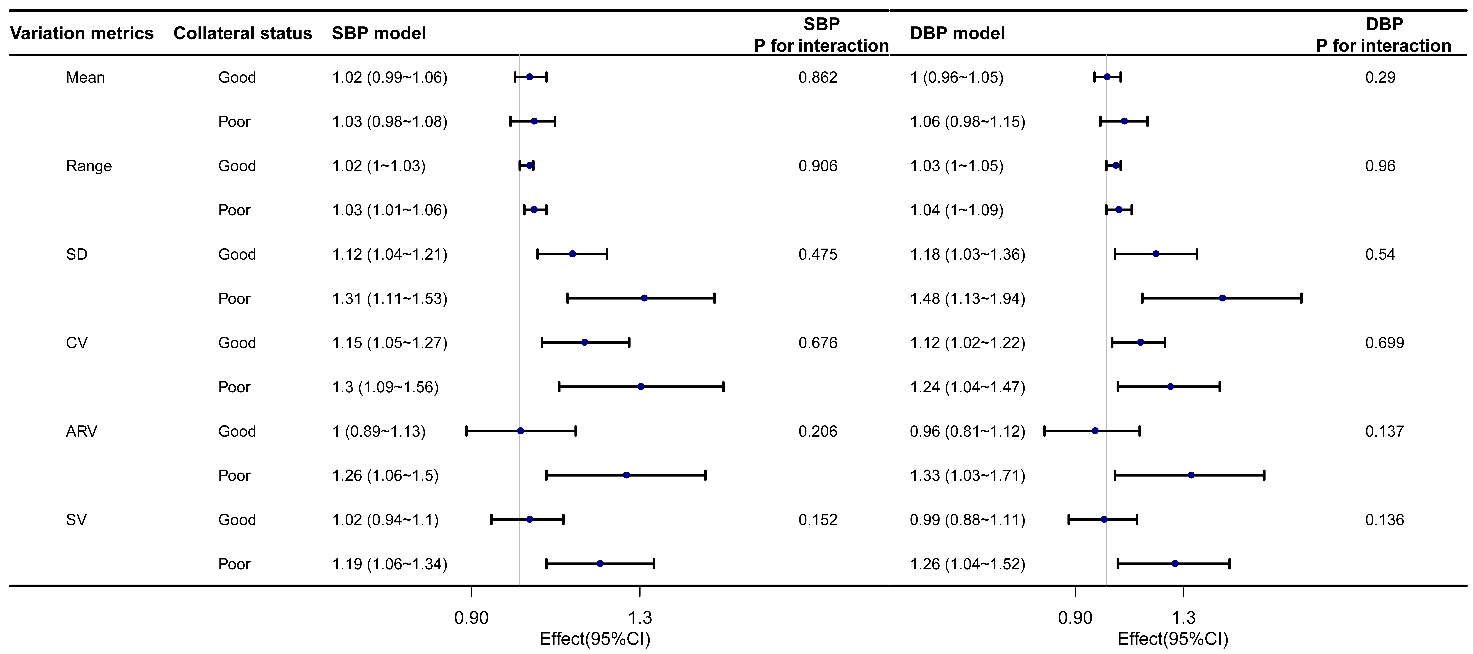
Supplementary Figure 1: Collateral status modification on the association between BPV within 72 hours post endovascular treatment and END


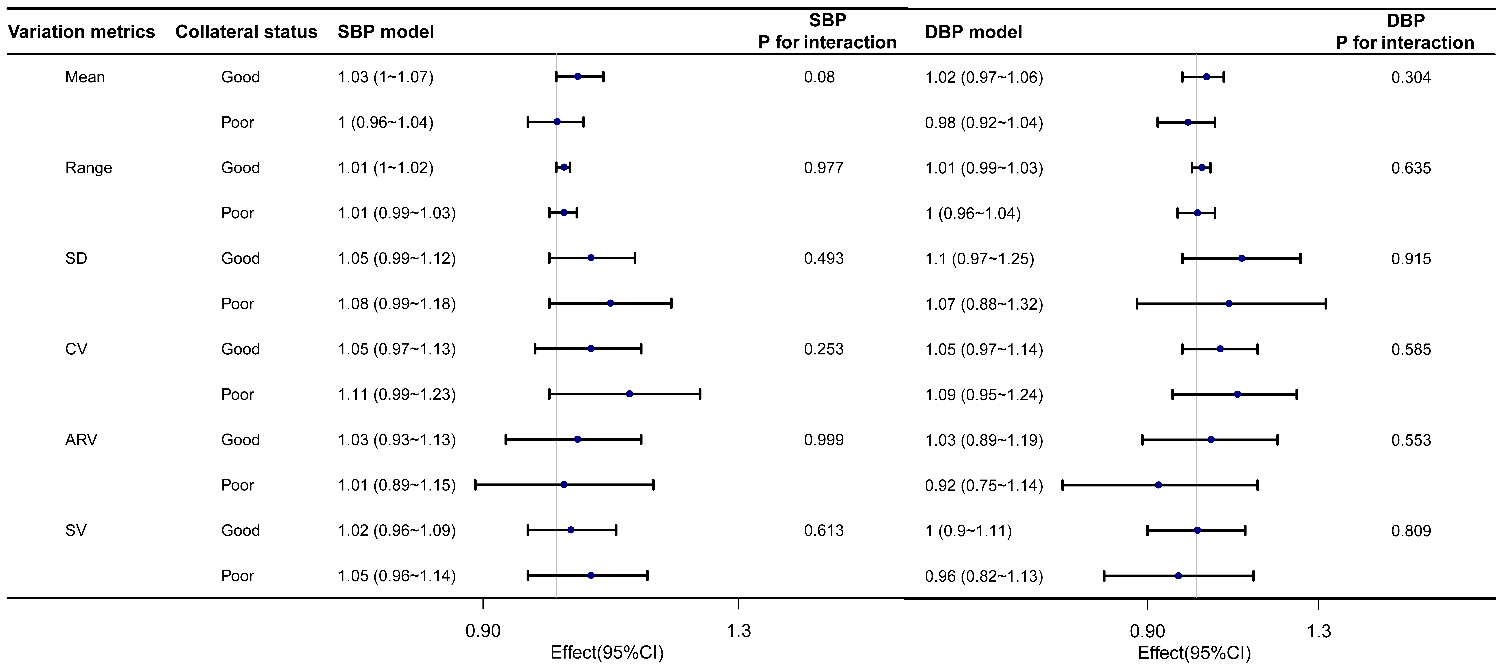
Supplementary Figure 2: Collateral status modification on the association between BPV within 72 hours post endovascular treatment and hemorrhagic transformation
